# Supplementary material
Source: PubMed Central journal article supplement (PMC8336262)
Supplement: 12862_2021_1883_MOESM1_ESM.pdf [file 12862_2021_1883_MOESM1_ESM.pdf]

## **Additional file 1: Survival probability for targets of different colours, in the field trials**

Supplementary Table 1: Hazard ratios (HRs) comparing the survival probability of specialist to generalist targets, by colour, and for each habitat. Confidence intervals (CI) excluding HR=1 indicate significant differences between colours.

### a. Hazard ratios relative to Generalist 1 (“Florentine Dream”)

| Colour | Habitat: Farm |               | Habitat: Woodland |               |
|--------|---------------|---------------|-------------------|---------------|
|        | <u>HR</u>     | <u>CI</u>     | <u>HR</u>         | <u>CI</u>     |
| AC     | 1.545         | 0.912 – 2.616 | 3.174             | 1.867 – 5.397 |
| VP     | 2.300         | 1.369 – 3.863 | 4.769             | 2.856 – 7.963 |
| CH     | 2.576         | 1.529 – 4.341 | 2.108             | 1.255 – 3.542 |
| PO     | 1.514         | 0.899 – 2.552 | 0.961             | 0.552 – 1.674 |
| CL     | 2.009         | 1.194 – 3.379 | 3.072             | 1.821 – 5.184 |
| TC     | 2.720         | 1.612 – 4.591 | 4.714             | 2.822 – 7.874 |
| HG     | 1.761         | 1.051 – 2.949 | 2.292             | 1.368 – 3.841 |
| LG     | 4.258         | 2.543 – 7.128 | 2.534             | 1.507 – 4.260 |
| WT     | 1.002         | 0.594 – 1.692 | 2.321             | 1.393 – 3.869 |

### b. Hazard ratios relative to Generalist 2 (“Wagon Train”)

| Colour | Habitat: Farm |               | Habitat: Woodland |               |
|--------|---------------|---------------|-------------------|---------------|
|        | <u>HR</u>     | <u>CI</u>     | <u>HR</u>         | <u>CI</u>     |
| AC     | 1.541         | 0.915 – 2.596 | 1.367             | 0.855 – 2.187 |
| VP     | 2.294         | 1.375 – 3.827 | 2.054             | 1.296 – 3.258 |
| CH     | 2.570         | 1.529 – 4.319 | 0.908             | 0.567 – 1.454 |
| PO     | 1.511         | 0.907 – 2.516 | 0.414             | 0.248 – 0.690 |
| CL     | 2.004         | 1.198 – 3.353 | 1.324             | 0.823 – 2.128 |
| TC     | 2.714         | 1.628 – 4.524 | 2.031             | 1.279 – 3.226 |
| HG     | 1.757         | 1.052 – 2.934 | 0.987             | 0.613 – 1.591 |
| LG     | 4.247         | 2.543 – 7.088 | 1.092             | 0.678 – 1.756 |
| FD     | 0.998         | 0.591 – 1.684 | 0.431             | 0.258 – 0.718 |
