# Supplementary material
Source: PubMed Central journal article supplement (PMC8336262)
Supplement: 12862_2021_1883_MOESM4_ESM.pdf [file 12862_2021_1883_MOESM4_ESM.pdf]

#### **Additional file 4: Paint colours used in field trials.**

Supplementary Table 6: CIELab values of target natural colours and chosen paint colours (as sample cards and actually painted on models), and quantification of colour differences between them.

| Strategy                       | Paint colour name              | Median colour of the target natural areas | Colour of chosen paint sample card      | Distance between target median & paint card colour (CIEDE2000) | Colour of chosen paint                  | Distance between target median & paint (CIEDE2000) |
|--------------------------------|--------------------------------|-------------------------------------------|-----------------------------------------|----------------------------------------------------------------|-----------------------------------------|----------------------------------------------------|
| Specialist<br>- grass          | “Chartreuse”<br>R228B          | L = 48.889<br>a = -12.702<br>b = 36.514   | L = 55.020<br>a = -10.127<br>b = 39.169 | 6.472                                                          | L = 61.043<br>a = -10.820<br>b = 44.831 | 12.109                                             |
|                                | “Pressed<br>Olives”<br>R239A   | L = 48.889<br>a = -12.702<br>b = 36.514   | L = 51.396<br>a = -9.328<br>b = 34.562  | 3.283                                                          | L = 55.095<br>a = -8.731<br>b = 35.166  | 6.634                                              |
| Specialist<br>- bracken        | “Aged<br>Cognac”<br>R101F      | L = 42.232<br>a = 9.945<br>b = 23.479     | L = 37.667<br>a = 9.962<br>b = 17.182   | 5.479                                                          | L = 42.182<br>a = 10.824<br>b = 21.923  | 1.377                                              |
|                                | “Village<br>Pub” R100F         | L = 42.232<br>a = 9.945<br>b = 23.479     | L = 38.517<br>a = 12.058<br>b = 18.059  | 5.454                                                          | L = 42.778<br>a = 12.350<br>b = 22.722  | 2.289                                              |
| Specialist<br>- leaf<br>litter | “Char Latte”<br>R106D          | L = 58.350<br>a = 12.916<br>b = 24.107    | L = 59.724<br>a = 9.981<br>b = 25.537   | 3.063                                                          | L = 65.542<br>a = 10.627<br>b = 31.536  | 7.801                                              |
|                                | “Toffee<br>Coffee”<br>R101D    | L = 58.350<br>a = 12.916<br>b = 24.107    | L = 58.880<br>a = 15.738<br>b = 21.839  | 3.078                                                          | L = 64.762<br>a = 17.307<br>b = 28.286  | 6.222                                              |
| Specialist<br>- bramble        | “Herb<br>Garland”<br>R262A     | L = 41.079<br>a = -6.603<br>b = 21.972    | L = 42.525<br>a = -8.520<br>b = 16.813  | 4.018                                                          | L = 44.046<br>a = -10.180<br>b = 16.866 | 5.548                                              |
|                                | “Leafy<br>Greens”<br>R261A     | L = 41.079<br>a = -6.603<br>b = 21.972    | L = 40.511<br>a = -7.802<br>b = 12.980  | 5.740                                                          | L = 41.529<br>a = -10.354<br>b = 11.865 | 7.684                                              |
| Generalist                     | “Florentine<br>Dream”<br>R108F | L = 44.777<br>a = 1.796<br>b = 22.399     | L = 45.21 3<br>a = 1.196<br>b = 23.949  | 3.160                                                          | L = 45.389<br>a = 0.316<br>b = 26.649   | 2.594                                              |
|                                | “Wagon<br>Train”<br>R106F      | L = 44.777<br>a = 1.796<br>b = 22.399     | L = 42.830<br>a = 4.765<br>b = 22.882   | 3.844                                                          | L = 44.624<br>a = 4.335<br>b = 24.871   | 2.554                                              |
