# Supplementary material
Source: PubMed Central journal article supplement (PMC8336262)
Supplement: 12862_2021_1883_MOESM5_ESM.pdf [file 12862_2021_1883_MOESM5_ESM.pdf]

## **Additional file 5: Field trial analyses, repeated with restricted datasets**

- Survival of generalist versus specialist targets in the field

Trends seen with the full dataset were borne out even when results were restricted to participants who completed trials in both field sites (N = 15, coxme, effect of strategy:  $\chi^2_1 = 24.201$ , HR = 0.573, CI = 0.455-0.723,  $z = -4.7$ ,  $p < 0.001$ ), and when excluding the single colour-blind participant (N = 14, coxme, effect of strategy:  $\chi^2_1 = 24.086$ , HR = 0.560, CI = 0.440-0.714,  $z = -4.69$ ,  $p < 0.001$ ).

- Survival of targets in the field, according to target colour

Supplementary Table 7: Model simplification tables for survival models testing the effects of weather, habitat and target colour on survival probability.

a. Dataset restricted to 15 participants, who completed both trials

| <b>Model</b>                | <b>Factor</b>   | <b><math>\chi^2</math></b> | <b>df</b> | <b>p</b>                  |
|-----------------------------|-----------------|----------------------------|-----------|---------------------------|
| <b>Across both habitats</b> | Order           | 0.573                      | 1         | 0.449                     |
|                             | Weather:Habitat | 0.851                      | 1         | 0.356                     |
|                             | Weather:Colour  | 13.325                     | 9         | 0.148                     |
|                             | Weather         | 0.185                      | 1         | 0.667                     |
|                             | Colour:Habitat  | 19.897                     | 9         | 0.0186                    |
| <b>Farm only</b>            | Order           | 0.0085                     | 1         | 0.926                     |
|                             | Colour:Weather  | 4.695                      | 9         | 0.860                     |
|                             | Weather         | 0.924                      | 1         | 0.336                     |
|                             | Colour          | 42.727                     | 9         | 2.419*10 <sup>-6</sup> †  |
| <b>Wood only</b>            | Order           | 1.136                      | 1         | 0.287                     |
|                             | Colour:Weather  | 10.976                     | 9         | 0.277                     |
|                             | Weather         | 0.437                      | 1         | 0.509                     |
|                             | Colour          | 63.436                     | 9         | 2.904*10 <sup>-10</sup> ‡ |

†: Key comparisons in the farm - All specialist colours survive worse than or similarly to generalists.

‡: Key comparisons in the wood - All specialist colours survive worse than or similarly to generalist 1; all survive worse than or similarly to generalist 2, except generalist 1 (HR = 0.444, CI = 0.242-0.814) & “Pressed Olives” (grass specialist, HR = 0.366, CI = 0.196-0.685).

b. Dataset restricted to 14 participants, excluding a colour-blind participant

| Model                       | Factor          | $\chi^2$ | df | p                         |
|-----------------------------|-----------------|----------|----|---------------------------|
| <b>Across both habitats</b> | Order           | 0.951    | 1  | 0.329                     |
|                             | Weather:Habitat | 0.546    | 1  | 0.460                     |
|                             | Weather:Colour  | 16.045   | 9  | 0.0660                    |
|                             | Colour:Habitat  | 14.046   | 9  | 0.121                     |
|                             | Weather         | 0.011    | 1  | 0.916                     |
|                             | Habitat         | 1.127    | 1  | 0.286                     |
|                             | Colour          | 89.514   | 9  | 1.998*10 <sup>-15</sup> * |

\*: Key comparisons - All specialist colours survive worse than or similarly to generalist 1; all survive worse than or similarly to generalist 2, except generalist 1 (HR = 0.483, CI = 0.313-0.745) & “Pressed Olives” (grass specialist, HR = 0.555, CI = 0.361-0.853).

- Survival of targets in the field, based on colour differences between targets and backgrounds

Supplementary Table 8: Effects of colour difference in  $\Delta E$  (CIEDE2000) between targets and backgrounds on detection risk in survival models, for restricted datasets. Models are ranked by increasing AIC, including the model testing the effect of strategy (generalist/specialist) for comparison. Hazard ratios (HR) >1 indicate that increasing difference between models and backgrounds increases detection risk. The HR for the Strategy model corresponds to a lower risk for generalists relative to specialists.

a. Dataset restricted to 15 participants, who completed both trials

| <u>Explanatory variable</u> |             |                     |      |       |               |            |        |          |  |
|-----------------------------|-------------|---------------------|------|-------|---------------|------------|--------|----------|--|
| Colour difference metric    | Area        | Distance from model | z    | HR    | CI            | $\chi^2_1$ | p      | AIC      |  |
| $\Delta E$ (CIEDE2000)      | Near zone   | 10m                 | 7.68 | 1.065 | 1.048 -1.083  | 60.437     | <0.001 | 5767.151 |  |
| $\Delta E$ (CIEDE2000)      | Near zone   | 30m                 | 6.68 | 1.054 | 1.038 -1.071  | 45.24      | <0.001 | 5782.068 |  |
| $\Delta E$ (CIEDE2000)      | Whole image | 10m                 | 6.38 | 1.052 | 1.036 - 1.068 | 41.226     | <0.001 | 5787.455 |  |
| $\Delta E$ (CIEDE2000)      | Whole image | 30m                 | 5.43 | 1.045 | 1.029 - 1.062 | 29.791     | <0.001 | 5798.761 |  |
| Strategy                    | -           | -                   | -4.7 | 0.573 | 0.455 - 0.723 | 24.201     | <0.001 | 5803.967 |  |
| Null                        | -           | -                   | -    | -     | -             | -          | -      | 5828.760 |  |

b. Dataset restricted to 14 participants, excluding the colour-blind participant.

| <u>Explanatory variable</u> |             |                     |       |       |               |            |        |          |
|-----------------------------|-------------|---------------------|-------|-------|---------------|------------|--------|----------|
| Colour difference metric    | Area        | Distance from model | z     | HR    | CI            | $\chi^2_1$ | p      | AIC      |
| $\Delta E$ (CIEDE2000)      | Near zone   | 10m                 | 7.56  | 1.066 | 1.048 -1.084  | 58.383     | <0.001 | 5318.495 |
| $\Delta E$ (CIEDE2000)      | Near zone   | 30m                 | 6.3   | 1.053 | 1.036 -1.070  | 40.321     | <0.001 | 5337.210 |
| $\Delta E$ (CIEDE2000)      | Whole image | 10m                 | 6.23  | 1.052 | 1.036 - 1.069 | 39.326     | <0.001 | 5339.194 |
| $\Delta E$ (CIEDE2000)      | Whole image | 30m                 | 5.47  | 1.047 | 1.030 - 1.065 | 30.169     | <0.001 | 5348.015 |
| Strategy                    | -           | -                   | -4.69 | 0.560 | 0.440 -0.714  | 24.086     | <0.001 | 5353.918 |
| Null                        | -           | -                   | -     | -     | -             | -          | -      | 5379.727 |

- Survival of microhabitat specialist targets in the field, based on the proportion of areas occupied by different patch types

As with the full dataset, when data are restricted to participants who completed trials in both field sites (N=15), the proportion of the area in the whole visual scene occupied by the same microhabitat as represented by the target had no effect on detection risk (coxme,  $\chi^2_1 = 0.0208$ , HR = 0.962, CI = 0.570-1.622, z = -0.15, p = 0.885), but there was a significant effect when this proportion was calculated for a restricted near zone around the target, (coxme,  $\chi^2_1 = 4.343$ , HR = 0.597, CI = 0.365-0.976, z = -2.06, p = 0.0372). However, neither variable is significant when the colour-blind participant is further excluded (N=14, coxme,  $\chi^2_1 = 0.215$ , HR = 1.136, CI = 0.664-1.944, z = 0.47, p = 0.643 &  $\chi^2_1 = 2.595$ , HR = 0.661, CI = 0.398-1.099, z = -1.59, p = 0.107 for proportion area in the whole image and near zone resp.).
